# Supplementary material for: Association between Carotid Plaque and Cognitive Impairment in Chinese Stroke Population: The SOS-Stroke Study
Source: PubMed Central journal article supplement (PMC5465192; doi:10.1038/s41598-017-02435-3), 2017-06-08
Supplement: 41598_2017_2435_MOESM1_ESM.pdf [file 41598_2017_2435_MOESM1_ESM.pdf]

**Full title:** Association between Carotid Plaque and Cognitive Impairment in Chinese Stroke

Population: The SOS-Stroke Study

**Running title:** Carotid Plaque and Cognitive Impairment

**Authors:** Anxin Wang, PhD<sup>1,2,3,4</sup>; Xiaoxue Liu, MD<sup>5</sup>; Guojuan Chen, MD<sup>6</sup>; Hongjun Hao, MD<sup>7</sup>; Yongjun Wang, MD<sup>1,2,3,4#</sup>; Yilong Wang, MD, PhD<sup>1,2,3,4#</sup>.

**Author's Affiliation:**

1. Department of Neurology, Beijing Tiantan Hospital, Capital Medical University, Beijing, China.
2. China National Clinical Research Center for Neurological Diseases, Beijing, China.
3. Center of Stroke, Beijing Institute for Brain Disorders, Beijing, China.
4. Beijing Key Laboratory of Translational Medicine for Cerebrovascular Disease, Beijing, China.
5. Department of Cardiology, Tangshan People's Hospital, Tangshan, China.
6. Department of Neurology, Tangshan Gongren Hospital, North China University of Science and Technology, Tangshan, China.
7. Department of Neurology, Peking University First Hospital, Beijing, China.

**#Correspondence to:**

Yilong Wang, MD, PhD

**Address:** No.6 Tiantanxili, Dongcheng District, Beijing, China, 100050.

**Email:** [yilong528@gmail.com](mailto:yilong528@gmail.com).

**Fax:** +86-10-67098351.

**Tel:** +86-10-67098222.

Yongjun Wang, MD

**Address:** Department of Neurology, Beijing TianTan Hospital, Capital Medical University,

No 6 Tiantanxili, Dongcheng District, Beijing 100050, China.

**Email:** yongjunwang1962@gmail.com

**Fax:** +86-010-67013383

**Tel:** +86-010-67098351

## Supplementary Tables

**Supplementary Table 1. Characteristics of patients according to the inclusion and exclusion.**

| Variable                    | Patients included<br>n = 3116 | Patients excluded<br>n = 1048 | p value |
|-----------------------------|-------------------------------|-------------------------------|---------|
| Age ,years                  | 63.42 ± 11.87                 | 65.45 ± 12.60                 | <0.0001 |
| Sex (men)                   | 2031 (65.18%)                 | 671 (64.03%)                  | 0.4987  |
| Married (Yes)               | 2908 (93.32%)                 | 999 (95.32%)                  | 0.0200  |
| Alcohol use (Yes)           | 960 (30.81%)                  | 302 (28.82%)                  | 0.2248  |
| Tobacco use (Yes)           | 1219 (39.12%)                 | 382 (36.45%)                  | 0.1243  |
| Physical activity (Yes)     | 1177 (37.77%)                 | 372 (35.50%)                  | 0.1872  |
| Education level, n (%)      |                               |                               |         |
| Middle school and below     | 2822 (90.56%)                 | 951 (90.74)                   | 0.8632  |
| High school and above       | 294 (9.44%)                   | 97 (9.26%)                    |         |
| History of disease, n (%)   |                               |                               |         |
| Hypertension                | 2064 (66.24%)                 | 678 (64.69%)                  | 0.3618  |
| Diabetes                    | 717 (23.01%)                  | 255 (24.33%)                  | 0.3815  |
| Hypercholesterolemia        | 359 (11.52%)                  | 84 (8.02%)                    | 0.0015  |
| Atrial fibrillation         | 143 (4.59%)                   | 98 (9.35%)                    | <0.0001 |
| Coronary artery disease     | 75 (2.41%)                    | 22 (2.10%)                    | 0.5678  |
| NIHSS, score                | 4 (2-7)                       | 5 (2-11)                      | <0.0001 |
| TOAST classification, n (%) |                               |                               |         |

---

|                               |               |              |         |
|-------------------------------|---------------|--------------|---------|
| Large artery atherosclerosis  | 1733 (55.62%) | 653 (62.31%) | <0.0001 |
| Cardioembolism                | 157 (5.04%)   | 103 (9.83%)  |         |
| Small vessel occlusion        | 1082 (34.72%) | 229 (21.85%) |         |
| Other determined etiology and | 144 (4.62%)   | 63 (6.01%)   |         |
| Undetermined etiology         |               |              |         |

---

SD: Standard Deviation; MMSE: Mini-Mental State Examination; NIHSS: National Institutes of Health Stroke Scale; TOAST: Trial of Org 10172 in Acute Stroke Treatment.

**Supplementary Table 2. Odds ratios of different cognitive domains in MMSE by carotid plaques \*.**

| MMSE                      | Plaque numbers   |                  | Artery numbers with plaque |                  | Plaque echo              |                         |
|---------------------------|------------------|------------------|----------------------------|------------------|--------------------------|-------------------------|
|                           | 1 <sup>#</sup>   | ≥2 <sup>#</sup>  | 1 <sup>#</sup>             | ≥2 <sup>#</sup>  | Hyperechoic <sup>#</sup> | Hypoechoic <sup>#</sup> |
| Orientation               | 1.30 (1.05-1.60) | 1.53 (1.28-1.84) | 1.29 (1.05-1.58)           | 1.56 (1.29-1.87) | 1.42 (1.20-1.68)         | 1.67 (1.08-2.57)        |
| Registration              | 1.30 (1.03-1.65) | 1.39 (1.13-1.71) | 1.25 (0.99-1.58)           | 1.44 (1.17-1.78) | 1.34 (1.12-1.62)         | 1.67 (1.04-2.66)        |
| Attention and Calculation | 1.45 (1.21-1.73) | 1.49 (1.27-1.74) | 1.42 (1.20-1.69)           | 1.51 (1.29-1.77) | 1.46 (1.27-1.68)         | 1.76 (1.20-2.58)        |
| Recall                    | 1.39 (1.16-1.68) | 1.48 (1.26-1.75) | 1.42 (1.19-1.71)           | 1.47 (1.24-1.73) | 1.42 (1.23-1.64)         | 1.99 (1.35-2.94)        |
| Language                  | 1.25 (1.05-1.50) | 1.39 (1.18-1.62) | 1.25 (1.05-1.49)           | 1.40 (1.19-1.64) | 1.30 (1.13-1.50)         | 2.03 (1.39-3.00)        |

\* Adjusted for as age, sex, education level, marriage status, alcohol use, tobacco use, physical activity, hypertension, diabetes, hypercholesterolemia, atrial fibrillation, coronary artery disease, NIHSS and TOAST.

<sup>#</sup> Refer to the group without carotid plaque.

MMSE: Mini-Mental State Examination; NIHSS: National Institutes of Health Stroke Scale; TOAST: Trial of Org 10172 in Acute Stroke Treatment.
